# Supplementary material
Source: PubMed Central journal article supplement (PMC5021302)
Supplement: NIHMS814322-supplement-Appendix_1.pdf [file NIHMS814322-supplement-Appendix_1.pdf]

**Appendix 1. Menu options for dietary intervention study. Subjects were permitted to choose between the two options for each meal.**

**Option #1**

| <b>Food</b>                                 | <b>Packaging/<br/>Brand</b>                    | <b>Amount</b> |
|---------------------------------------------|------------------------------------------------|---------------|
| <b>Breakfast:</b>                           |                                                |               |
| Oatmeal                                     | Cardboard                                      | 1 ounce       |
| Blackberries (Seasonal substitute: Bananas) | Organic                                        | 1 each        |
| Yogurt                                      | # 5 container                                  | 1 cup         |
| <b>Lunch:</b>                               |                                                |               |
| Beans                                       | Organic/plastic bag                            | ¾ cup (2 oz)  |
| Rice                                        | Organic/plastic bag                            | 2 oz          |
| Salsa                                       | Fresh Wegmans in container                     | ½ cup         |
| Corn (Seasonal substitute: Sweet Potatoes)  | Organic                                        | ½ cup         |
| Strawberries (Seasonal substitute: Pears)   | Organic                                        | .5 cup        |
| Milk                                        | Glass jar                                      | 1 cup         |
| <b>Dinner:</b>                              |                                                |               |
| Beef                                        | Organic (fresh cut) or plastic (avoid cryovac) | 2.5 oz (3.25) |
| Red peppers                                 | Organic                                        | .5 cup        |
| Broccoli                                    | Organic                                        | .5 cup        |
| Bread                                       | Organic WG                                     | 2 oz          |
| Butter                                      | Wax paper                                      | 2 tsp         |
| Kiwi                                        | Organic                                        | .5 cup        |
| Milk                                        | Glass jar                                      | 1 cup         |
| Peanut oil                                  | Glass jar                                      | 2 tbs         |
| <b>Snack #1:</b>                            |                                                |               |
| Apple                                       | Organic                                        | .5 cup        |
| Nuts                                        | Cardboard                                      | ¼ oz          |
| <b>Snack #2</b>                             |                                                |               |
| Carrots                                     | Organic                                        | 1 cup         |
| Popcorn<br>(Organic crackers sub)           | Cardboard                                      | 1 oz          |

**Option #2**

| <b>Food</b>       | <b>Packaging/<br/>Brand</b> | <b>Amount</b> |
|-------------------|-----------------------------|---------------|
| <b>Breakfast:</b> |                             |               |
| Yogurt            | #5 container                | 1 cup         |
| Raspberries       | Organic                     | .5 cup        |
| Bread             | Organic WG                  | 1 oz          |
| Butter            | Wax paper                   | 1 tsp         |

|                               |                             |               |
|-------------------------------|-----------------------------|---------------|
|                               |                             |               |
| <b>Lunch:</b>                 |                             |               |
| Chicken                       | Fresh cut organic preferred | 2.5 (3.25oz)  |
| Pasta                         | cardboard                   | 2 oz          |
| Tomatoes                      | Fresh organic               | 1 cup         |
| Orange                        | Organic                     | .5 cup        |
| Milk                          | Glass jar                   | 1 cup         |
| Olive oil                     | Glass container             | 2 tbs         |
|                               |                             |               |
| <b>Dinner:</b>                |                             |               |
| Chicken                       | Fresh cut organic preferred | 2.5 (3.25 oz) |
| Carrots                       | Organic                     | .5 cup        |
| Red potatoes                  | Organic                     | .5 cup        |
| Bread                         | Organic WG                  | 2 oz          |
| Butter                        | Wax paper                   | 2 tsp         |
| Grapes                        | Organic                     | .5 cup        |
| Milk                          | Glass jar                   | 1 cup         |
|                               |                             |               |
| <b>Snack #1:</b>              |                             |               |
| Banana                        | Organic                     | .5 cup        |
| Nuts                          | Cardboard                   | ¼ oz          |
|                               |                             |               |
| <b>Snack #2</b>               |                             |               |
| Carrots                       | Organic                     | 1 cup         |
| Popcorn (or organic crackers) | Organic                     | 1 oz          |

#### Alternate Lunch or Dinner

| Food    | Packaging/<br>Brand         | Amount        |
|---------|-----------------------------|---------------|
| Chicken | Organic/Fresh cut preferred | 2.5 (3.25 oz) |
| Bread   | Organic WG                  | 2 oz          |
| Carrots | Organic                     | 1 cup         |
| Grapes  | Organic                     | .5 cup        |
| Milk    | Glass jar                   | 1 cup         |
| Oil     | Glass                       | 2 tbs         |

#### Additional Snack for 2<sup>nd</sup> and 3<sup>rd</sup> trimester

| Food    | Package/<br>Brand           | Amount      |
|---------|-----------------------------|-------------|
| Chicken | Organic/Fresh cut preferred | 1 (1.75 oz) |
| Bread   | Organic WG                  | 2 oz        |
| Carrots | Organic                     | .5 cup      |
| Oil     | Glass                       | 2 tbs       |

- Juice can be substituted for milk if subject is unable to drink milk.
- Food allergies and intolerances of the subjects will be provided to the Bionutrition core before menu is ordered.
- The Bionutrition core will provide food record forms for the study subjects.
- The Bionutrition core will develop an instructional sheet on how to safely re-heat the meals prepared for the study.
