# Supplementary material
Source: PubMed Central journal article supplement (PMC5021302)
Supplement: NIHMS814322-supplement-Appendix_2.pdf [file NIHMS814322-supplement-Appendix_2.pdf]

Appendix 2. Summary of deviations from provided diet by subject (n=5; other 5 subjects reported complete compliance).

| Subject | 1                                                                       | 2                                              | 3                                                          | 4                                                        | 5                                                                                                                                            |
|---------|-------------------------------------------------------------------------|------------------------------------------------|------------------------------------------------------------|----------------------------------------------------------|----------------------------------------------------------------------------------------------------------------------------------------------|
|         | Added sugar, salt, pepper, "Soul Food" seasoning to some provided meals | Consumed peanut butter on crackers at one meal | Added sugar, milk, salt, and cheese to some provided meals | Consumed a glass of raspberry and lemon juice with sugar | Added sugar, ranch dressing, salt, pepper to some provided meals; consumed half a boiled egg and a mini bar of chocolate bar on one occasion |
