# Supplementary material
Source: PubMed Central journal article supplement (PMC5021302)
Supplement: NIHMS814322-supplement-Appendix_3.pdf [file NIHMS814322-supplement-Appendix_3.pdf]

Appendix 3. Summary of recurring themes (with examples) emerging from qualitative interviews.

***Dissatisfaction with seasonings on foods provided during the intervention***

“The food, the meat was tasteless. We cook with Sofrito and Adobo. We cook with lots of seasonings, so I couldn’t really taste (the provided foods).”

“I, well, African Americans, we season our food to the ‘nines...’ I’m just like, ‘some hot sauce on this chicken...’ that was hard, not being able to season it.”

***Barriers to eating fresh or organic foods***

“I don’t have anybody to take me to the grocery store all the time...I go once a month...I store it in the freezer. Bread, whatever, right here.”

“The price was higher...that’s it...the (provided) orange was organic and it didn’t taste no different than a regular orange, and I’m like... ‘it don’t taste like org-nothing.’ ”

“I think (foods given during the intervention) would be expensive because...we went to (the grocery store). I saw these, the price of bread for example. Right now, no (I can’t buy these things), unfortunately.”

***Exposure to foods in the intervention led to changes in purchasing habits***

“It was a little more expensive, but you got food stamps. Why not? ...Now, since they (other family members) like it...I could get it.”

“(My son) did a little trying out with me....then he told me ‘mom, you could start getting me some more organic stuff.’ That works too, if you can eat some healthy stuff, that would be great for me if I can help the baby.”
